# Supplementary material for: A 15-year record of CO emissions constrained by MOPITT CO observations
Source: Copernicus journal article supplement (doi:10.5194/acp-17-4565-2017), 2017-04-06
Supplement: Supplementary file [file acp-17-4565-2017-supplement.pdf]

Supplement of Atmos. Chem. Phys., 17, 4565–4583, 2017  
<http://www.atmos-chem-phys.net/17/4565/2017/>  
doi:10.5194/acp-17-4565-2017-supplement  
© Author(s) 2017. CC Attribution 3.0 License.

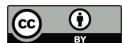

*Supplement of*

## **A 15-year record of CO emissions constrained by MOPITT CO observations**

**Zhe Jiang et al.**

*Correspondence to:* Zhe Jiang (zhejiang@ucar.edu)

The copyright of individual parts of the supplement might differ from the CC-BY 3.0 licence.

## Supporting Information

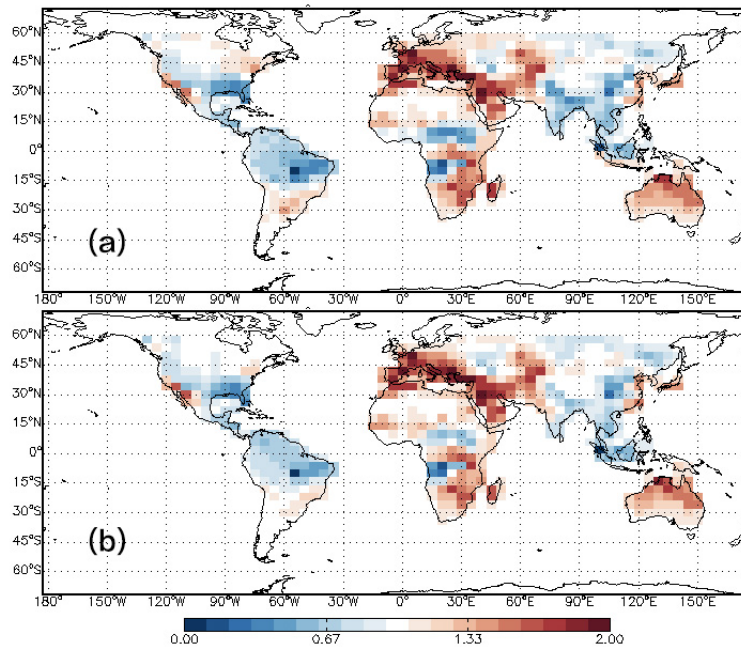

**Figure S1.** Scaling factors for June 2004 using MOPITT profile (10 levels) data. The scaling factors are defined as the ratio of the a posteriori to a priori emissions. (a) result with 20% uniform error (this work) (b) result with full error covariance matrix based on MOPITT error covariance. There are only limited discrepancies between these two results.
